# Supplementary material for: Heterostructure design of Cu2O/Cu2S core/shell nanowires for solar-driven photothermal water vaporization towards desalination
Source: Royal Society of Chemistry journal article supplement (doi:10.1039/d0se00914h), 2020-01-01
Supplement: d0se00914h1.pdf [file d0se00914h1.pdf]

## Supporting Information

### **Heterostructure design of Cu<sub>2</sub>O/Cu<sub>2</sub>S core/shell nanowires for solar-driven photothermal water vaporization towards desalination**

*Liangri Ying, Han Zhu, \* Huilin Li, Zhenfeng Zhu, Shuhui Sun, Xiaofan Wang,  
Shuanglong Lu, Mingliang Du\**

Key Laboratory of Synthetic and Biological Colloids, Ministry of Education, School of  
Chemical and Material Engineering, Jiangnan University, Wuxi 214122, P. R. China

Email: zhysw@jiangnan.edu.cn; [du@jiangnan.edu.cn](mailto:du@jiangnan.edu.cn)

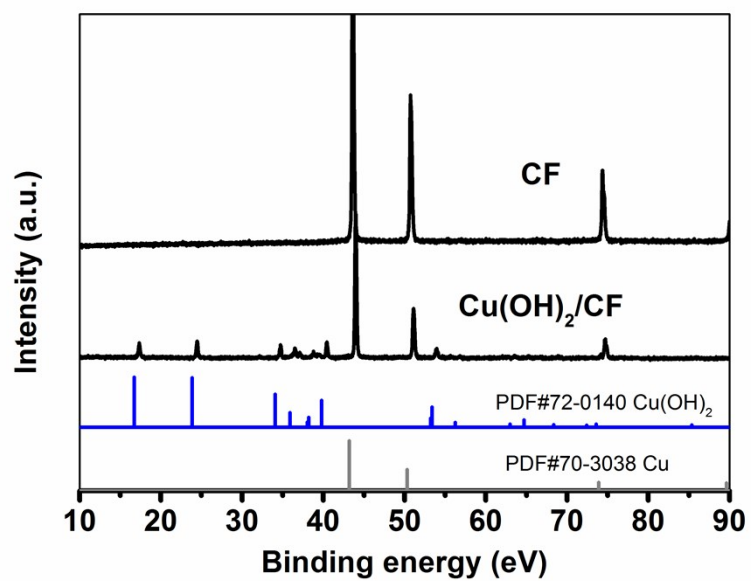

**Figure S1.** XRD patterns of the CF and Cu(OH)<sub>2</sub>/CF architectures.

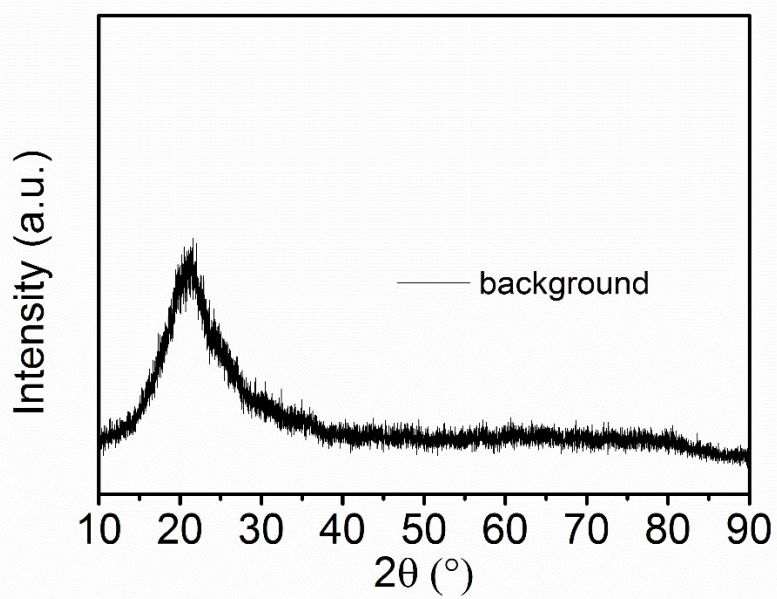

**Figure S2.** XRD patterns of the glass support floor.

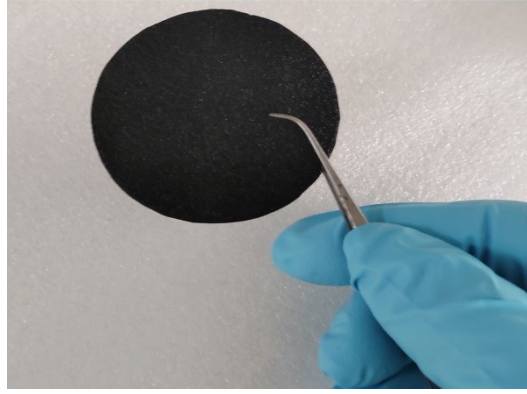

Figure S3. Optical photograph of  $\text{Cu}_2\text{S}/\text{Cu}_2\text{O}/\text{CF}$ .

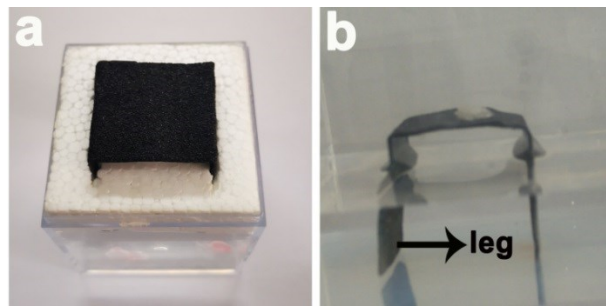

Figure S4. Optical photograph of the home-make water transfer device.

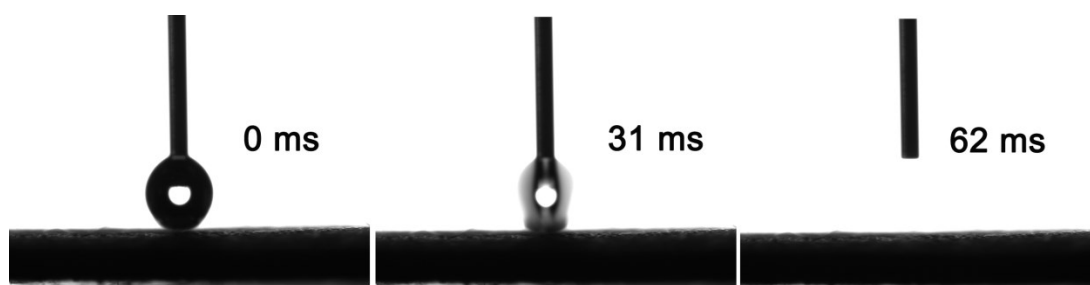

**Figure S5.** The dynamic contact angles of 5  $\mu\text{L}$  sessile droplets on the  $\text{Cu}_2\text{S}/\text{Cu}_2\text{O}/\text{CF}$ .

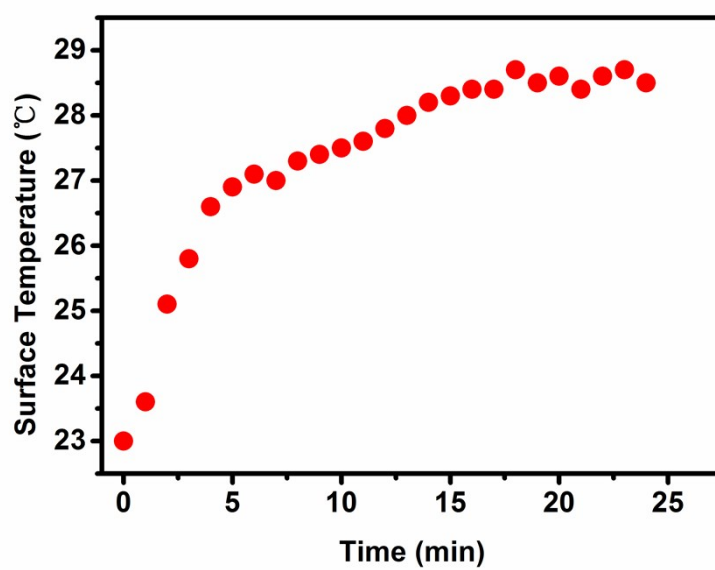

**Figure S6.** The surface temperature changes of cotton under one sun irradiation.

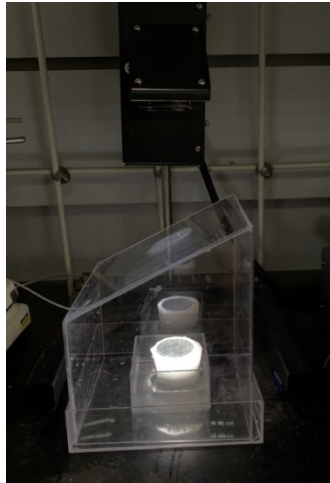

**Figure S7.** Digital photograph of the designed solar-thermal water evaporation device.

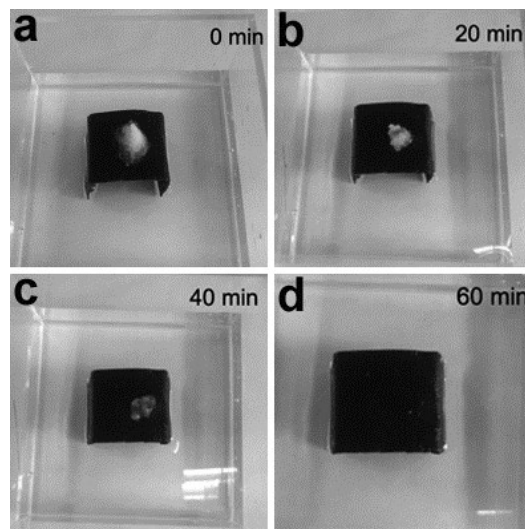

**Figure S8.** The design approach is shown in Figure S2,  $\text{Cu}_2\text{S}/\text{Cu}_2\text{O}/\text{CF}$  is placed in the solution with 3.5 wt% NaCl, the distance between evaporation surface and water is one centimeter.

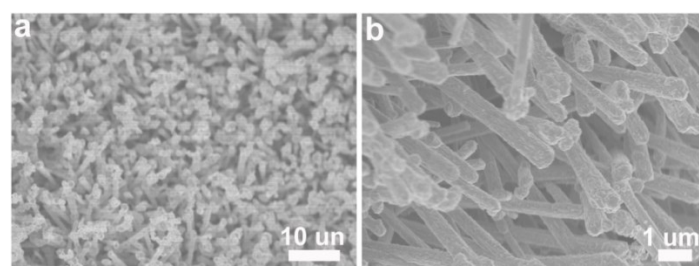

**Figure S9.** SEM images of the Cu<sub>2</sub>S/Cu<sub>2</sub>O/CF (a) after cycle desalination tests and (b) 1M NaOH treatment.

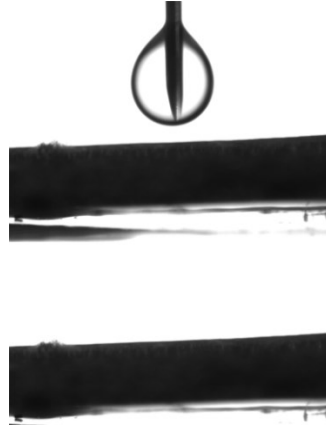

**Figure S10.** Underwater oil contact angle of CF.

**Table S1.** The composition of the prepared simulated water.

| NaCl  | NaHCO <sub>3</sub> | Na <sub>2</sub> SO <sub>4</sub> | KCl   | MgCl <sub>2</sub> | CaCl <sub>2</sub> | Mg(NO <sub>3</sub> ) <sub>2</sub> | Water |
|-------|--------------------|---------------------------------|-------|-------------------|-------------------|-----------------------------------|-------|
| 6.68g | 0.05g              | 0.87g                           | 0.18g | 0.57g             | 0.28g             | 1.73g                             | 250g  |

**Table S2.** Comparison of the water evaporation property of Cu<sub>2</sub>S/Cu<sub>2</sub>O/CF to the other photothermal materials.

| Photothermal materials | Light intensity (Kw m <sup>-2</sup> ) | evaporation rate (kg m <sup>-2</sup> h <sup>-1</sup> ) | η | reference |
|------------------------|---------------------------------------|--------------------------------------------------------|---|-----------|
|------------------------|---------------------------------------|--------------------------------------------------------|---|-----------|

|                                                |      |      |       |           |
|------------------------------------------------|------|------|-------|-----------|
| Cu <sub>2</sub> O/Cu <sub>2</sub> S/CF         | 1    | 1.44 | 83.1% | This work |
| Cu <sub>7</sub> S <sub>4</sub> /Cu mesh        | 1    | 1.41 | 88.1% | 1         |
| S-Ni foam                                      | 1    | 1.29 | 83.6% | 2         |
| W <sub>18</sub> O <sub>49</sub> @PDMS membrane | 1    | 1.15 | 82%   | 3         |
| ce-MoS <sub>2</sub> /BNC                       | 5.53 | 6.15 | 81.4% | 4         |
| Ni-NiOx/Ni foam                                | 1    | 1.41 | 94%   | 5         |
| PANI@PVDF                                      | 1    | 1.41 | 85%   | 6         |
| SnSe-SnSe <sub>2</sub> film                    | 1    | 1.28 | 84%   | 7         |
| GO/PVA EFMs                                    | 1    | 1.4  | 90%   | 8         |
| Cu/PE membrane                                 | 1    | 1.02 | 63.9% | 9         |
| MDPC/SS mesh                                   | 1    | 1.22 | 84%   | 10        |
| D-HNb <sub>3</sub> O <sub>8</sub> /PAM         | 1    | 1.4  | 91%   | 11        |

## References

- (1) Li, X.; Yao, Z.; Wang, J.; Li, D.; Yu, K.; Jiang, Z. A Novel Flake-like Cu<sub>7</sub>S<sub>4</sub> Solar Absorber for High-Performance Large-Scale Water Evaporation. *ACS Applied Energy Materials* **2019**, *2* (7), 5154.
- (2) Zhao, S.; Chen, L.; Zhang, C.; Hasi, Q. M.; Zhang, L.; Luo, X.; Li, A. Functional oil-repellent photothermal materials based on nickel foam for efficient solar steam generation. *Solar Energy Materials and Solar Cells* **2020**, *214*, 110574.
- (3) Chang, Y.; Wang, Z.; Shi, Y. e.; Ma, X.; Ma, L.; Zhang, Y.; Zhan, J. Hydrophobic W<sub>18</sub>O<sub>49</sub> mesocrystal on hydrophilic PTFE membrane as an efficient solar steam generation device under one sun. *Journal of Materials Chemistry A* **2018**, *6* (23), 10939.
- (4) Ghim, D.; Jiang, Q.; Cao, S.; Singamaneni, S.; Jun, Y. S. Mechanically interlocked 1T/2H phases of MoS<sub>2</sub> nanosheets for solar thermal water purification. *Nano Energy* **2018**, *53*,

949.

- (5) Wu, D.; Qu, D.; Jiang, W.; Chen, G.; An, L.; Zhuang, C.; Sun, Z. Self-floating nanostructured Ni–NiOx/Ni foam for solar thermal water evaporation. *Journal of Materials Chemistry A* **2019**, *7* (14), 8485.
- (6) Zou, Y.; Chen, X.; Guo, W.; Liu, X.; Li, Y. Flexible and Robust Polyaniline Composites for Highly Efficient and Durable Solar Desalination. *ACS Applied Energy Materials* **2020**, *3* (3), 2634.
- (7) Tahir, Z.; Kim, S.; Ullah, F.; Lee, S.; Lee, J. h.; Park, N. W.; Seong, M. J.; Lee, S. K.; Ju, T. S.; Park, S. et al. Highly Efficient Solar Steam Generation by Glassy Carbon Foam Coated with Two-Dimensional Metal Chalcogenides. *ACS Applied Materials & Interfaces* **2020**, *12* (2), 2490.
- (8) Guo, X.; Gao, H.; Wang, S.; Yin, L.; Dai, Y. Scalable, flexible and reusable graphene oxide-functionalized electrospun nanofibrous membrane for solar photothermal desalination. *Desalination* **2020**, *488*, 114535.
- (9) Shang, M.; Li, N.; Zhang, S.; Zhao, T.; Zhang, C.; Liu, C.; Li, H.; Wang, Z. Full-Spectrum Solar-to-Heat Conversion Membrane with Interfacial Plasmonic Heating Ability for High-Efficiency Desalination of Seawater. *ACS Applied Energy Materials* **2018**, *1* (1), 56.
- (10) Ma, S.; Qarony, W.; Hossain, M. I.; Yip, C. T.; Tsang, Y. H. Metal-organic framework derived porous carbon of light trapping structures for efficient solar steam generation. *Solar Energy Materials and Solar Cells* **2019**, *196*, 36.
- (11) Yang, M. Q., Tan, C. F., Lu, W., Zeng, K., Ho, G. W. Spectrum tailored defective 2D semiconductor nanosheets aerogel for full-spectrum-driven photothermal water evaporation and photochemical degradation. *Advanced Functional Materials* **2020**, 2004460.
